# Supplementary material
Source: HighWire-hosted journal article supplement (https://bmjopen.bmj.com/content/12/3/e052586)
Supplement: inline-supplementary-material-1 [file inline-supplementary-material-1.pdf]

**Supplemental Figure 1. Regional Distribution of Guangdong Province**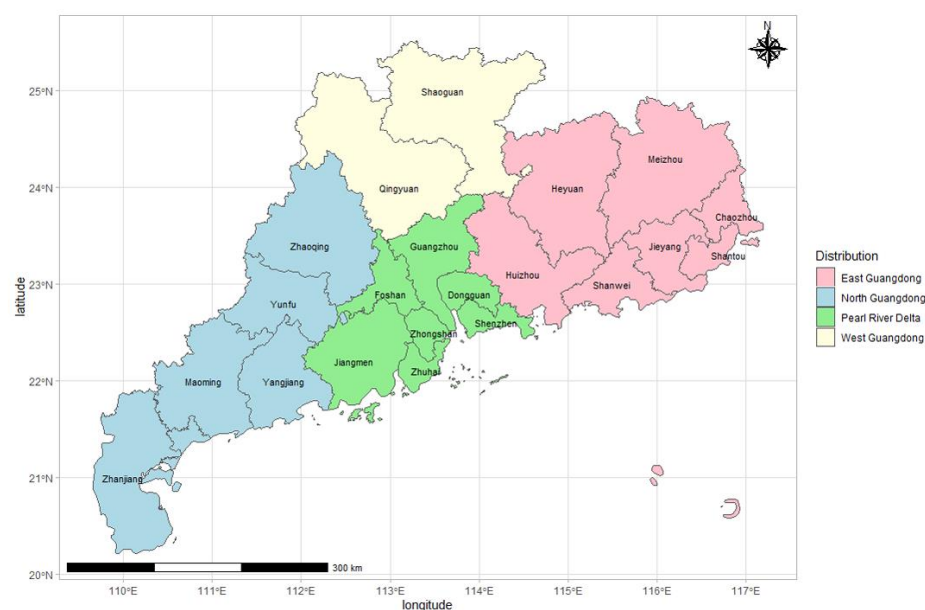**Supplemental Table 1 Factors associated with time to presentation in individuals with gonorrhea infection stratified by gender in Guangdong, China, 2017 (N=1664)**

| Characteristics                       | Male               |                      | Female             |                       |
|---------------------------------------|--------------------|----------------------|--------------------|-----------------------|
|                                       | <i>cβ</i> (95% CI) | <i>aβ</i> (95% CI) # | <i>cβ</i> (95% CI) | <i>aβ</i> (95% CI) #  |
| <b>Age</b>                            |                    |                      |                    |                       |
| ≤25                                   | <i>Ref</i>         | <i>Ref</i>           | <i>Ref</i>         | <i>Ref</i>            |
| 26-40                                 | -0.15(-0.37,0.07)  | -0.04(-0.29,0.21)    | -0.17(-0.8,0.47)   | -0.69(-1.34, -0.04)   |
| >40                                   | -0.02(-0.3,0.25)   | 0.07(-0.26,0.41)     | -0.59(-1.7,0.52)   | -1.48(-2.76, -0.21)   |
| <b>Marital Status</b>                 |                    |                      |                    |                       |
| Married                               | <i>Ref</i>         | <i>Ref</i>           | <i>Ref</i>         | <i>Ref</i>            |
| Unmarried/Widow/divorced              | 0.14(-0.06,0.34)   | 0.16(-0.08,0.4)      | -0.22(-0.93,0.49)  | -1.04(-1.89, -0.19) * |
| <b>Highest Educational Attainment</b> |                    |                      |                    |                       |
| Primary school and junior high school | <i>Ref</i>         | <i>Ref</i>           | <i>Ref</i>         | <i>Ref</i>            |
| Senior high school                    | -0.18(-0.4,0.04)   | -0.17(-0.40,0.06)    | -0.08(-0.82,0.66)  | -0.57(-1.35,0.20)     |
| Undergraduate and over                | -0.20(-0.46,0.06)  | -0.17(-0.44,0.10)    | 0.15(-0.60,0.90)   | -0.31(-1.09,0.47)     |
| <b>Sexual orientation</b>             |                    |                      |                    |                       |
| Heterosexual                          | <i>Ref</i>         | <i>Ref</i>           | <i>Ref</i>         | <i>Ref</i>            |
| Gay, bisexual                         | -0.15(-0.74,0.44)  | -0.19(-0.80,0.41)    | -                  | -                     |
| <b>Geographic regions</b>             |                    |                      |                    |                       |
| Pearl River Delta                     | <i>Ref</i>         | <i>Ref</i>           | <i>Ref</i>         | <i>Ref</i>            |
| East Guangdong                        | 0.47(0.15,0.79) *  | 0.54(0.21,0.86) *    | -                  | -                     |
| West Guangdong                        | 0.00(-0.61,0.6)    | -0.07(-0.69,0.55)    | -0.22(-1.21,0.77)  | -0.77(-1.89,0.35)     |
| North Guangdong                       | 0.08(-0.32,0.48)   | 0.02(-0.39,0.43)     | -0.49(-2.01,1.04)  | 0.09(-1.92,2.10)      |
| <b>Previous other STD infections</b>  |                    |                      |                    |                       |

|                                                    |                   |                   |                   |                   |
|----------------------------------------------------|-------------------|-------------------|-------------------|-------------------|
| Yes                                                | <i>Ref</i>        | <i>Ref</i>        | <i>Ref</i>        | <i>Ref</i>        |
| No                                                 | -0.06(-0.77,0.66) | -0.04(-0.76,0.68) | -0.50(-2.37,1.37) | -0.51(-2.07,1.05) |
| <b>Previous gonorrhea infection</b>                |                   |                   |                   |                   |
| Yes                                                | <i>Ref</i>        | <i>Ref</i>        | <i>Ref</i>        | <i>Ref</i>        |
| No                                                 | -0.21(-0.94,0.52) | -0.2(-0.94,0.54)  | 1.14(-6.44,8.73)  | 0.84(-5.51,7.18)  |
| <b>Urethral purulent discharge</b>                 |                   |                   |                   |                   |
| Yes                                                | <i>Ref</i>        | <i>Ref</i>        | <i>Ref</i>        | <i>Ref</i>        |
| No                                                 | 0.26(0.01,0.51) * | 0.24(-0.02,0.49)  | -0.42(-1.27,0.42) | -0.5(-1.45,0.45)  |
| <b>Dysuria</b>                                     |                   |                   |                   |                   |
| Yes                                                | <i>Ref</i>        | <i>Ref</i>        | <i>Ref</i>        | <i>Ref</i>        |
| No                                                 | 0.23(0.00,0.45) * | 0.22(0.00,0.45) * | 0.34(-0.33,1.00)  | 0.84(-0.10,1.79)  |
| <b>Frequent micturition</b>                        |                   |                   |                   |                   |
| Yes                                                | <i>Ref</i>        | <i>Ref</i>        | <i>Ref</i>        | <i>Ref</i>        |
| No                                                 | 0.08(-0.12,0.28)  | 0.07(-0.14,0.27)  | 0.5(-0.41,1.40)   | 1.02(-0.20,2.23)  |
| <b>Urgent micturition</b>                          |                   |                   |                   |                   |
| Yes                                                | <i>Ref</i>        | <i>Ref</i>        | <i>Ref</i>        | <i>Ref</i>        |
| No                                                 | 0.09(-0.11,0.29)  | 0.08(-0.12,0.29)  | 0.37(-0.47,1.21)  | 0.41(-0.57,1.39)  |
| <b>Redness swelling of the urethra or cervix</b>   |                   |                   |                   |                   |
| Yes                                                | <i>Ref</i>        | <i>Ref</i>        | <i>Ref</i>        | <i>Ref</i>        |
| No                                                 | 0.11(-0.09,0.32)  | 0.15(-0.06,0.36)  | 0.38(-0.31,1.07)  | 0.5(-0.28,1.27)   |
| <b>Number of sex partners in the past 6 months</b> |                   |                   |                   |                   |
| 0                                                  | <i>Ref</i>        | <i>Ref</i>        | <i>Ref</i>        | <i>Ref</i>        |
| 1                                                  | 0.79(-1.44,3.02)  | 0.8(-1.42,3.02)   | 0.69(-4.16,5.53)  | 1.44(-6.40,9.29)  |
| Multiple                                           | 0.76(-1.47,2.99)  | 0.8(-1.42,3.03)   | 0.69(-4.17,5.55)  | 1.51(-6.38,9.41)  |
| <b>Having commercial sex in the past 6 months</b>  |                   |                   |                   |                   |
| No                                                 | <i>Ref</i>        | <i>Ref</i>        | <i>Ref</i>        | <i>Ref</i>        |
| Yes                                                | -0.08(-0.28,0.12) | -0.08(-0.28,0.12) | -0.56(-1.86,0.73) | -0.54(-2.04,0.96) |
| <b>Consistent condom uses in the past 6 months</b> |                   |                   |                   |                   |
| No                                                 | <i>Ref</i>        | <i>Ref</i>        | <i>Ref</i>        | <i>Ref</i>        |
| Yes                                                | -0.34(-0.84,0.15) | -0.35(-0.85,0.14) | -1.02(-5.72,3.68) | -1.33(-7.48,4.82) |

Note: # Age, education, and marital status were adjusted for each other; all other variables were adjusted for age, gender, education, and marital status. \* $P < 0.05$ .

**Supplemental Table 2 Factors associated with sexual contact while symptomatic in individuals with gonorrhea infection stratified by gender in Guangdong, China, 2017 (N=1664)**

| Characteristics | Male            |                 | Female          |                 |
|-----------------|-----------------|-----------------|-----------------|-----------------|
|                 | cOR(95% CI)     | aOR(95% CI) #   | cOR(95% CI)     | aOR(95% CI) #   |
| <b>Age</b>      |                 |                 |                 |                 |
| ≤25             | <i>Ref</i>      | <i>Ref</i>      | <i>Ref</i>      | <i>Ref</i>      |
| 26-40           | 1.03(0.79,1.32) | 1.05(0.79,1.4)  | 0.81(0.35,1.85) | 0.56(0.19,1.63) |
| >40             | 1.19(0.86,1.66) | 1.16(0.78,1.72) | 0.9(0.33,2.47)  | 0.67(0.18,2.42) |

|                                                                     |                     |                      |                 |                 |
|---------------------------------------------------------------------|---------------------|----------------------|-----------------|-----------------|
| <b>Marital Status</b>                                               |                     |                      |                 |                 |
| Married                                                             | <i>Ref</i>          | <i>Ref</i>           | <i>Ref</i>      | <i>Ref</i>      |
| Unmarried/Widow/divorced                                            | 0.94(0.75,1.17)     | 0.99(0.75,1.29)      | 0.88(0.4,1.93)  | 0.74(0.26,2.13) |
| <b>Highest Educational Attainment</b>                               |                     |                      |                 |                 |
| Primary and Junior High School                                      | <i>Ref</i>          | <i>Ref</i>           | <i>Ref</i>      | <i>Ref</i>      |
| Senior high school                                                  | 0.92(0.72,1.19)     | 0.93(0.72,1.21)      | 1.67(0.73,3.81) | 1.89(0.77,4.66) |
| Undergraduate and over                                              | 0.78(0.58,1.05)     | 0.79(0.58,1.06)      | 0.63(0.22,1.85) | 0.69(0.22,2.11) |
| <b>Sexual orientation</b>                                           |                     |                      |                 |                 |
| Heterosexual                                                        | <i>Ref</i>          | <i>Ref</i>           | <i>Ref</i>      | <i>Ref</i>      |
| Gay/bisexual                                                        | 0.97(0.54,1.73)     | 1.01(0.56,1.81)      | -               | -               |
| <b>Geographic regions</b>                                           |                     |                      |                 |                 |
| Pearl River Delta                                                   | <i>Ref</i>          | <i>Ref</i>           | <i>Ref</i>      | <i>Ref</i>      |
| East Guangdong                                                      | 0.97(0.56,1.69)     | 0.92(0.53,1.61)      | -               | -               |
| West Guangdong                                                      | 1.32(0.7,2.48)      | 1.26(0.67,2.37)      | 2.1(0.76,5.83)  | 2.06(0.66,6.38) |
| North Guangdong                                                     | 1.17(0.74,1.86)     | 1.13(0.71,1.79)      | 1.05(0.29,3.76) | 1.15(0.27,5.01) |
| <b>Previous gonorrhea infection</b>                                 |                     |                      |                 |                 |
| No                                                                  | <i>Ref</i>          | <i>Ref</i>           | <i>Ref</i>      | <i>Ref</i>      |
| Yes                                                                 | 1.08(0.39,3.01)     | 1.10(0.39,3.09)      | -               | -               |
| <b>Number of days between symptom onset and health care seeking</b> |                     |                      |                 |                 |
| 0-1                                                                 | <i>Ref</i>          | <i>Ref</i>           | <i>Ref</i>      | <i>Ref</i>      |
| 2-3                                                                 | 3.52(1.84,6.73) *   | 3.59(1.88,6.87) *    | -               | -               |
| 4-7                                                                 | 10.16(5.39,19.17) * | 10.41(5.52,19.65) *  | -               | -               |
| >7                                                                  | 43.57(22.5,84.37) * | 45.24(23.31,87.79) * | -               | -               |
| <b>Urethral purulent discharge</b>                                  |                     |                      |                 |                 |
| Yes                                                                 | <i>Ref</i>          | <i>Ref</i>           | <i>Ref</i>      | <i>Ref</i>      |
| No                                                                  | 1.31(0.95,1.82)     | 1.32(0.96,1.83)      | 0.51(0.22,1.21) | 0.42(0.16,1.09) |
| <b>Dysuria</b>                                                      |                     |                      |                 |                 |
| Yes                                                                 | <i>Ref</i>          | <i>Ref</i>           | <i>Ref</i>      | <i>Ref</i>      |
| No                                                                  | 1.21(0.91,1.61)     | 1.22(0.92,1.62)      | 0.53(0.25,1.13) | 0.5(0.23,1.08)  |
| <b>Frequent micturition</b>                                         |                     |                      |                 |                 |
| Yes                                                                 | <i>Ref</i>          | <i>Ref</i>           | <i>Ref</i>      | <i>Ref</i>      |
| No                                                                  | 1.03(0.82,1.29)     | 1.05(0.84,1.32)      | 1.2(0.52,2.77)  | 1.14(0.47,2.79) |
| <b>Urgent micturition</b>                                           |                     |                      |                 |                 |
| Yes                                                                 | <i>Ref</i>          | <i>Ref</i>           | <i>Ref</i>      | <i>Ref</i>      |
| No                                                                  | 0.98(0.78,1.23)     | 1.01(0.8,1.26)       | 1.2(0.52,2.77)  | 1.11(0.46,2.66) |
| <b>Redness swelling of the urethra or cervix</b>                    |                     |                      |                 |                 |
| Yes                                                                 | <i>Ref</i>          | <i>Ref</i>           | <i>Ref</i>      | <i>Ref</i>      |
| No                                                                  | 0.97(0.77,1.21)     | 0.99(0.79,1.24)      | 1.09(0.52,2.29) | 1.23(0.56,2.69) |

Note: # Age, education, and marital status were adjusted for each other; all other variables were adjusted for age, gender, education, and marital status. \* $P < 0.05$ .
